# Supplementary material for: Toll Like Receptor 4 and IFNγ Signalling axis as a therapeutic target in Triple negative Breast Cancer
Source: Research Square preprint supplement (doi:10.21203/rs.3.rs-5395333/v1), 2024-12-04
Supplement: Supplementary file 1 [file 696c6747ea56225c5e960847.docx]

**Supplementary Table I**: List of primers used for qRT-PCR analysis

| **Oligo Name** | **Sequence 5' to 3'** |
| --- | --- |
| TLR3-FP-RT | CCTGGTTTGTTAATTGGATTAACGA |
| TLR3-RP-RT | TGAGGTGGAGTGTTGCAAAGG |
| TLR4-FP-RT | ATGCCAGGATGATGTCTGCC |
| TLR4-RP-RT | GGATTTCACACCTCCACGCA |
| TLR6-FP-RT | CTTCCATTTTGTTTGCCTTAT |
| TLR6-RP-RT | AGCGGTAGGTCTTTTGGAAC |
| TLR7-FP-RT | AAACTCCTTGGGGCTAGATG |
| TLR7-RP-RT | AGGGTGAGGTTCGTGGTGTT |
| TLR9-FP-RT | CCCCCAGCATGGGTTTCTG |
| TLR9-RP-RT | GAAGTGGGGCACAGACTTCA |
| 18S-FP-RT | GGAGAGGGAGCCTGAGAAAC |
| 18S-RP-RT | CCTCCAATGGATCCTCGTTA |
|  |  |
