# Supplementary material for: Toll Like Receptor 4 and IFNγ Signalling axis as a therapeutic target in Triple negative Breast Cancer
Source: Research Square preprint supplement (doi:10.21203/rs.3.rs-5395333/v1), 2024-12-04
Supplement: Supplementary file 2 [file c6d7809b40628d25e82164bb.docx]

1. Supplementary Methodology
   1. *Quantitative Real Time PCR (qRT PCR)*

The total RNA was isolated using TRIzol reagent according to the manufacturer's protocol (Invitrogen, USA). The qRT PCR analysis was carried out using the primers presented in **supplementary Table 1**. Real-time quantification of the TLR genes was performed using iTaq Universal SYBR Green Supermix kit (Biorad) according to manufacturer’s instruction on the Bio-Rad™ CFX96™ Real Time Thermal Cycler PCR machine (Biorad) with 18S as control. Experimental samples were run in duplicate with the same concentration of cDNA (synthesized from 1µg RNA) per reaction. To check the amplicon contamination, each run contained no template controls in duplicate for each probe used. Cycle threshold (CT) values were recorded. To determine the relative level of gene expression, the comparative threshold cycle (ddCt) method was employed as described in Livak et al 2001. The list of primers utilised in

- 1. *Multiplex immunofluorescence Staining*

Briefly, 3 μm thick paraffin embedded sections of human TNBC tumor and tumor adjacent normal breast tissues were deparaffinized and subjected to decreasing alcohol grades (100%,90%, 70%), followed by antigen retrieval in 10mM sodium citrate buffer (pH 6) and blocking with 5% Bovine serum albumin (BSA). These sections were then incubated with primary antibody for CDH1, (Santacruz, USA, 14472S) at 1:50 dilution overnight and followed by incubation with secondary antibody for 60mins. The secondary antibody was tagged with CF488A dye (Biotinum, Inc. CA, USA) and the signals were further amplified using tyramide amplification kit. The sections were again subjected to antigen retrieval buffer treatment, followed by blocking in 5% BSA. These sections were then double probed with primary antibody for TLR4 (Cell Signaling Technology, sc-293072; 1:100 dilution) for 60 minutes followed by incubation with secondary antibody for another 60 minutes. The secondary antibody was then tagged with a fluorescent dye (CF568) and the signals were further amplified by using tyramid amplification kit (Biotium, Inc. CA, USA). Eventually, sections were mounted with Prolong gold antifade reagent with DAPI (CST, USA #8961). Slides were viewed and images were captured using a fluorescence microscope equipped with an sCMOS camera (Leica Microsystems DMi8, Mannheim, Germany). The Fluoreescent intensity was quantified using ImageJ (Fiji version) software.

*1.3 Enzyme-linked immunosorbent assay (ELISA)*

Total N=10 human TNBC tumor sample lysates were quantified for TLR4 and IFNG expression by ELISA. For the analysis, the total protein content in the tumor lysates were first quantified by using Pierce BCA Protein Assay Kit (Thermofisher). For the ELISA assay, equal amount of tumor tissue lysate (1mg/ml) was used. Commercially available ELISA kits were used for estimating expression levels of TLR4 and IFNG in TNBC tumour lysates as per manufacture’s protocol.

*1.4 Flowcytometric Analysis*

Approximately, 1x106 TNBC cells (MDA MB 231, MDA MB 468) were incubated with fluorescently labelled monoclonal antibodies (TLR4-APC, Biolgend, #145403) for 20 min at room temperature and washed twice with staining buffer [phosphate-buffered saline (PBS) with 0.2% fetal bovine serum (FBS). Flow-cytometric data acquisition was performed on BD FACS Aria Fusion flow cytometer where at least 100,000 events gated on lymphocyte population were acquired. The data obtained was analyzed using FlowJo software (BD Biosciences). BD FACS Aria Fusion flow cytometer was used for analysis and gating on BD FACS Diva software. Negative Control compensation beads (BD Biosciences) was used to set compensation parameters. Fluorescence minus one (FMO) control was used to identify and gate cells.

*1.5 Single-Cell Analysis of Wu et al 2020 dataset*

The raw count matrix was normalized to Transcripts Per Million (TPM) and then Principle Component Analysis (PCA) was carried out using Scanpy python package. To identify cell types from gene expression we used the CellO python package. We developed a training model for each dataset as the built-in model was not trained as per our dataset. To identify cell types expressing TLR4 we used the scanpy module to generate a Uniform Manifold Approximation and Projection (UMAP) scatter plot.

*1.6* *RNAseq analysis and TNBC TCGA analysis*

The gene expression matrix and clinical data for TCGA Breast Cancer cohort was used to understand the correlation of TLRs with Tumor-infiltrating Lymphocytes (TILs) and Cytokines. The analysis was performed using R software v4.2.1, and the correlations matrix was obtained using the rcorr function from the Hmisc library, the Spearman correlation method was used. The box plots were generated using the ggplot2 library and a heatmap was created using GraphPad prism version 8.
